# Supplementary material for: Silencing of Aquaporin Homologue Accumulates Uric Acid and Decreases the Lifespan of the Asian Citrus Psyllid, Diaphorina citri (Hemiptera: Liviidae)
Source: MDPI journal article supplement (doi:10.3390/insects12100931), 2021-10-13
Supplement: s1 [file s1]

**Table S1.** Candidate Aquaporin homologs of *D. citri* producing significant alignments with the aquaporin from human, *Homo sapiens* (*HsAQPI*; accession no. P29972.3) <sup>a</sup>.

| NCBI Database                                               |                                |     |           |             |                 |         |                | Psyllid Database ( <i>Diaphorina citri</i> OGS v2.0 Proteins) |                                  |                   |         |         |       |
|-------------------------------------------------------------|--------------------------------|-----|-----------|-------------|-----------------|---------|----------------|---------------------------------------------------------------|----------------------------------|-------------------|---------|---------|-------|
| Description                                                 | Accession                      | aa  | Max Score | Total Score | Query Cover (%) | E value | Per. Ident (%) | Description                                                   | Description                      | Per. aa Ident (%) | Aln     | E value | Score |
| <a href="#">Aquaporin AQPae.a</a>                           | <a href="#">XP_008484232.1</a> | 270 | 194       | 194         | 84              | 2e-61   | 43.86          | Aquaporin AQPae.a 2-RE.                                       | <a href="#">DcitrP097770.1.5</a> | 249 43.53         | 101/232 | 2e-62   | 196   |
|                                                             |                                |     |           |             |                 |         |                | Aquaporin AQPae.a 2-RC.                                       | <a href="#">DcitrP097770.1.3</a> | 249 43.53         | 101/232 | 2e-62   | 196   |
|                                                             |                                |     |           |             |                 |         |                | Aquaporin AQPae.a 2-RA.                                       | <a href="#">DcitrP097770.1.1</a> | 250 43.53         | 101/232 | 2e-62   | 196   |
|                                                             |                                |     |           |             |                 |         |                | Aquaporin AQPae.a 2-RD.                                       | <a href="#">DcitrP097770.1.4</a> | 256 43.53         | 101/232 | 3e-62   | 196   |
|                                                             |                                |     |           |             |                 |         |                | Aquaporin AQPae.a 2-RB.                                       | <a href="#">DcitrP097770.1.2</a> | 256 43.53         | 101/232 | 3e-62   | 196   |
| <a href="#">Aquaporin AQPae.a</a>                           | <a href="#">XP_026677945.1</a> | 269 | 166       | 166         | 83              | 2e-50   | 39.56          | Aquaporin 4-like protein 2-RA.                                | <a href="#">DcitrP039775.1.1</a> | 260 39.56         | 89/225  | 1e-50   | 166   |
|                                                             |                                |     |           |             |                 |         |                | Aquaporin 4-like protein 2-RB.                                | <a href="#">DcitrP039775.1.2</a> | 269 39.56         | 89/225  | 2e-50   | 166   |
|                                                             |                                |     |           |             |                 |         |                | Aquaporin 4-like protein 2-RA.                                | <a href="#">DcitrP097795.1.1</a> | 269 39.82         | 88/221  | 3e-50   | 166   |
| <a href="#">Aquaporin-4-like</a>                            | <a href="#">XP_008487274.2</a> | 237 | 103       | 103         | 79              | 1e-26   | 27.48          | Aquaporin AQPae.a 2-RA.                                       | <a href="#">DcitrP039960.1.1</a> | 250 30.63         | 68/222  | 1e-24   | 98.6  |
|                                                             |                                |     |           |             |                 |         |                | Aquaporin AQPae.a 2-RA.                                       | <a href="#">DcitrP039965.1.1</a> | 292 30.63         | 68/222  | 2e-24   | 99.0  |
|                                                             |                                |     |           |             |                 |         |                | Aquaporin AQPae.a 2-RA.                                       | <a href="#">DcitrP039950.1.1</a> | 292 30.63         | 68/222  | 2e-24   | 99.0  |
| <a href="#">Aquaporin</a>                                   | <a href="#">AIU99816.1</a>     | 102 | 88.2      | 88.2        | 33              | 2e-22   | 47.25          | Aquaporin                                                     | <a href="#">DcitrP039815.1.2</a> | 129 46.73         | 50/107  | 1e-27   | 103   |
|                                                             |                                |     |           |             |                 |         |                | Aquaporin                                                     | <a href="#">DcitrP039815.1.1</a> | 129 46.73         | 50/107  | 1e-27   | 103   |
| <a href="#">Aquaporin AQPae.a-like</a>                      | <a href="#">XP_026680357.1</a> | 248 | 76.6      | 76.6        | 79              | 1e-16   | 29.30          | Aquaporin AQPae.a 2-RA.                                       | <a href="#">DcitrP039960.1.1</a> | 250 30.63         | 68/222  | 1e-24   | 98.6  |
|                                                             |                                |     |           |             |                 |         |                | Aquaporin AQPae.a 2-RA.                                       | <a href="#">DcitrP039965.1.1</a> | 292 30.63         | 68/222  | 2e-24   | 99.0  |
|                                                             |                                |     |           |             |                 |         |                | Aquaporin AQPae.a 2-RA.                                       | <a href="#">DcitrP039950.1.1</a> | 292 30.63         | 68/222  | 2e-24   | 99.0  |
| <a href="#">Aquaporin-4-like</a>                            | <a href="#">XP_017303216.2</a> | 167 | 73.2      | 73.2        | 71              | 5e-16   | 29.29          | Aquaporin 4-like protein 2-RA.                                | <a href="#">DcitrP090745.1.1</a> | 242 30.14         | 63/209  | 3e-22   | 92.0  |
| <a href="#">Aquaporin-4-like</a>                            | <a href="#">XP_008479681.1</a> | 178 | 72.8      | 72.8        | 61              | 7e-16   | 24.14          | -                                                             | -                                | -                 | -       | -       | -     |
| <a href="#">Neurogenic protein big brain</a>                | <a href="#">XP_026681128.1</a> | 875 | 72.0      | 142         | 79              | 2e-14   | 29.33          | Neurogenic protein big brain                                  | <a href="#">DcitrP005045.1.1</a> | 119 39.09         | 43/110  | 2e-13   | 65.1  |
| <a href="#">Aquaporin TIP1-2-like</a>                       | <a href="#">XP_026684712.1</a> | 112 | 53.1      | 53.1        | 23              | 3e-09   | 41.27          | -                                                             | -                                | -                 | -       | -       | -     |
| <a href="#">Aquaporin-1-like</a>                            | <a href="#">XP_026686140.1</a> | 205 | 54.3      | 54.3        | 30              | 5e-09   | 37.04          | -                                                             | -                                | -                 | -       | -       | -     |
| <a href="#">Aquaporin-2-like</a>                            | <a href="#">XP_008487273.1</a> | 184 | 52.8      | 52.8        | 43              | 2e-08   | 27.97          | -                                                             | -                                | -                 | -       | -       | -     |
| <a href="#">Intraflagellar transport protein 81 homolog</a> | <a href="#">XP_026682461.1</a> | 527 | 46.2      | 46.2        | 15              | 8e-06   | 44.19          | -                                                             | -                                | -                 | -       | -       | -     |

<sup>a</sup> Provided genes have been matched using the protein-protein BLAST (BLASTP 2.8.0+) (Altschul et al., 1997, 2005), based on recent available data in GenBank, National Center for Biotechnology Information website (NCBI, <https://www.ncbi.nlm.nih.gov/protein/1-9-2021>) and the official gene set v2.0 (OGS-v2.0 proteins) for *D. citri* on citrus greening solutions website ([https://citrusgreening.org/organism/Diaphorina\\_citri/genome/1-9-2021](https://citrusgreening.org/organism/Diaphorina_citri/genome/1-9-2021)).

Table S2. Aquaporin gene sequences used in the phylogenetic tree

| <b>Organism</b>            | <b>Accession number and Database</b>              |
|----------------------------|---------------------------------------------------|
| <i>D. citri</i>            | XP_008484232.1 NCBI ;<br>A0A1S3DLD8_DIACI UniProt |
| <i>B. tabaci</i>           | B5L019_BEMTA UniProt                              |
| <i>M. persicae</i>         | A0A0H3XRM3_MYZP UniProt                           |
| <i>A. pysum</i>            | B8RCD1_ACYPI UniProt                              |
| <i>C. quinquefasciatus</i> | B0WQA3_CULQU UniProt                              |
| <i>B. tabaciB</i>          | A0A1I9WA80_BEMT UniProt                           |
| <i>A. mellifera</i>        | A0A088A4U5_APIM UniProt                           |
| <i>D. busckii</i>          | A0A0M4EHN7 UniProt                                |
| <i>D. ananassae</i>        | B3MDR4 UniProt                                    |
| <i>C. tarsalis</i>         | A0A1Q3FJU2_CULTA UniProt                          |
| <i>A. albopictus</i>       | A0A182H3E9_AEDAL UniProt                          |
| <i>F. bacteriumB</i>       | A0A2E7MG94_9FLA UniProt                           |
| <i>E. coliB</i>            | A0A1E5WVX1_ECOL UniProt                           |
| <i>C. trifoliata(2)</i>    | A0A060BRL1_9ROS UniProt                           |
| <i>C. trifoliata</i>       | A0A060BKS6_9ROS UniProt                           |
| <i>F. bacterium</i>        | A0A2E5ZSN1_9FLA UniProt                           |
| <i>E. coli</i>             | A0A2B7LP91_ECOL UniProt                           |
| <i>D. melanogaster</i>     | H6V591_DROME UniProt                              |
| <i>A. aegypti</i>          | Q9NHW7.2 NCBI                                     |
